# Supplementary material
Source: PubMed Central journal article supplement (PMC11477822)
Supplement: ajcr0014-4567-f4.pdf [file ajcr0014-4567-f4.pdf]

The impact of MASLD on HCC after resection

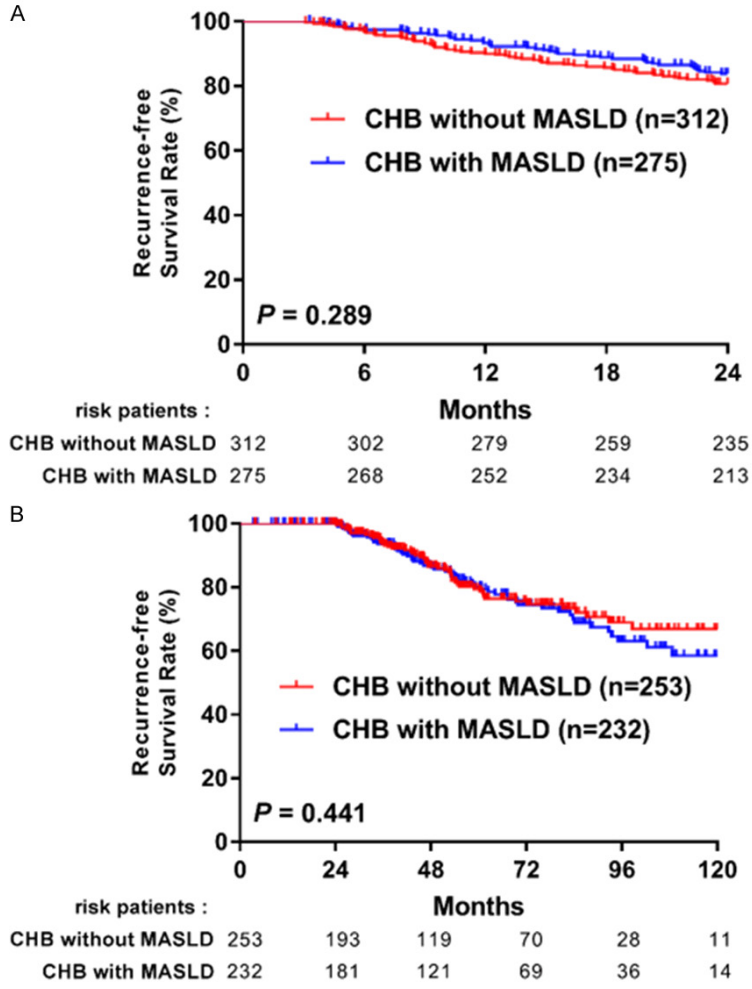

**Figure S1.** Early RFS (A) and late RFS (B) after curative resection in patients with HBV-related HCC with or without MASLD.
